# Supplementary figures and images for: Epidemiology and Dynamics of BK Polyomavirus Replication after Kidney Transplantation
Source: MDPI journal article supplement (doi:10.3390/pathogens13040315), 2024-04-12

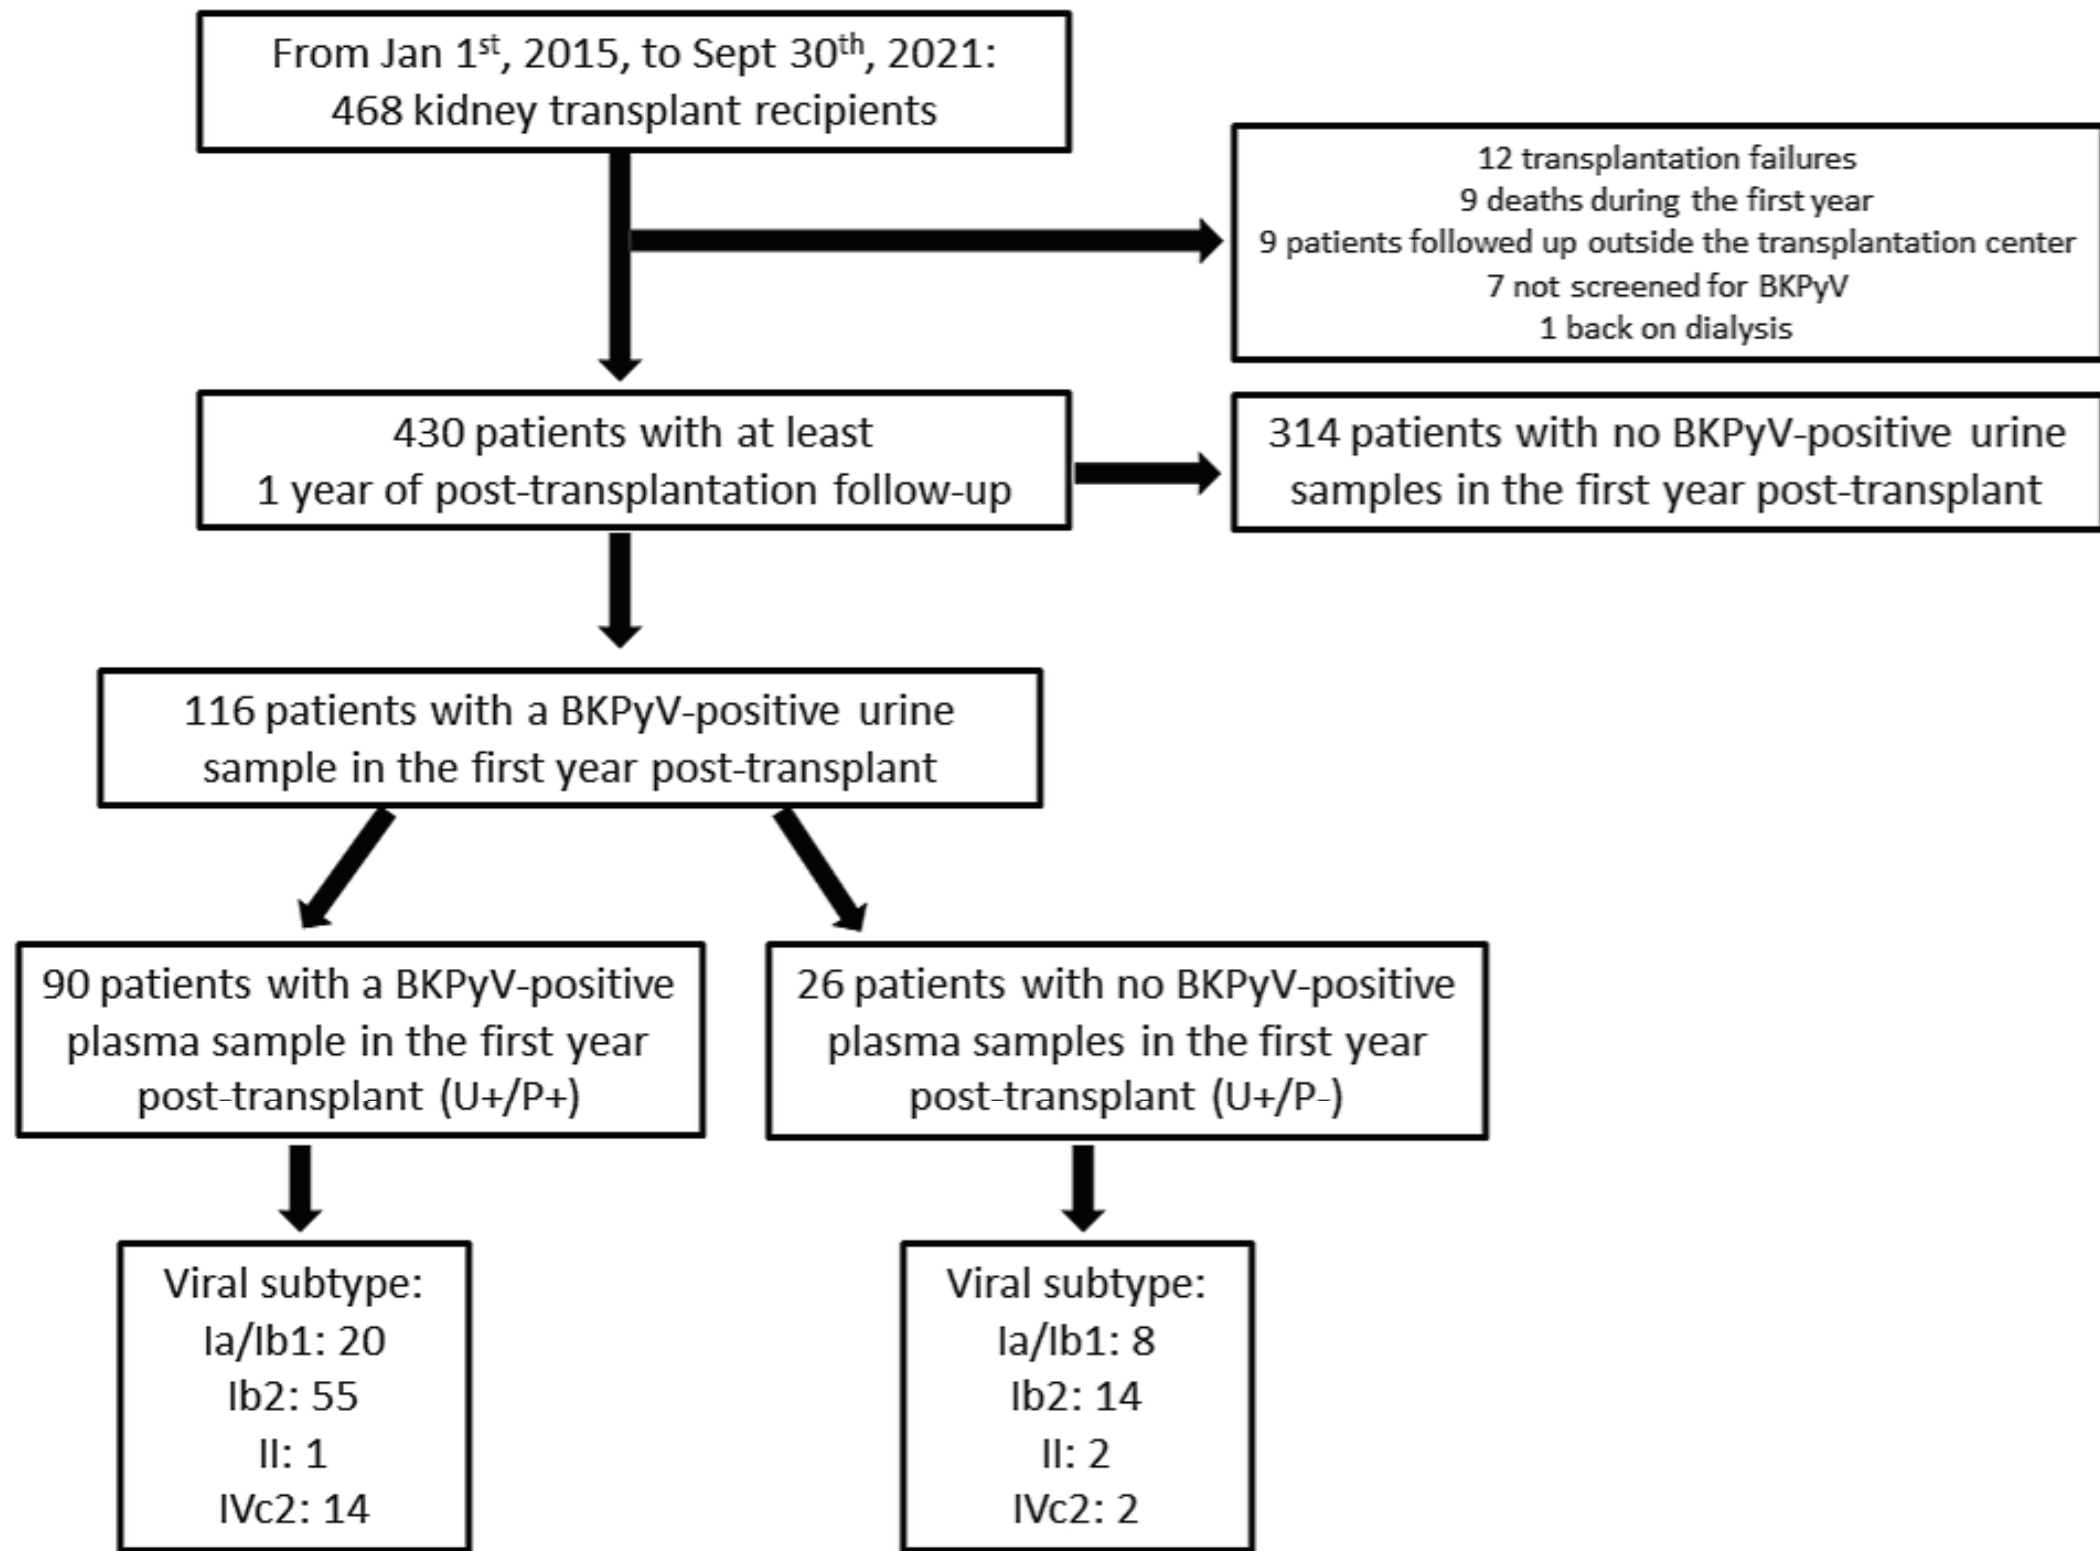

Supplement: s1 [file s1]

FIG S2

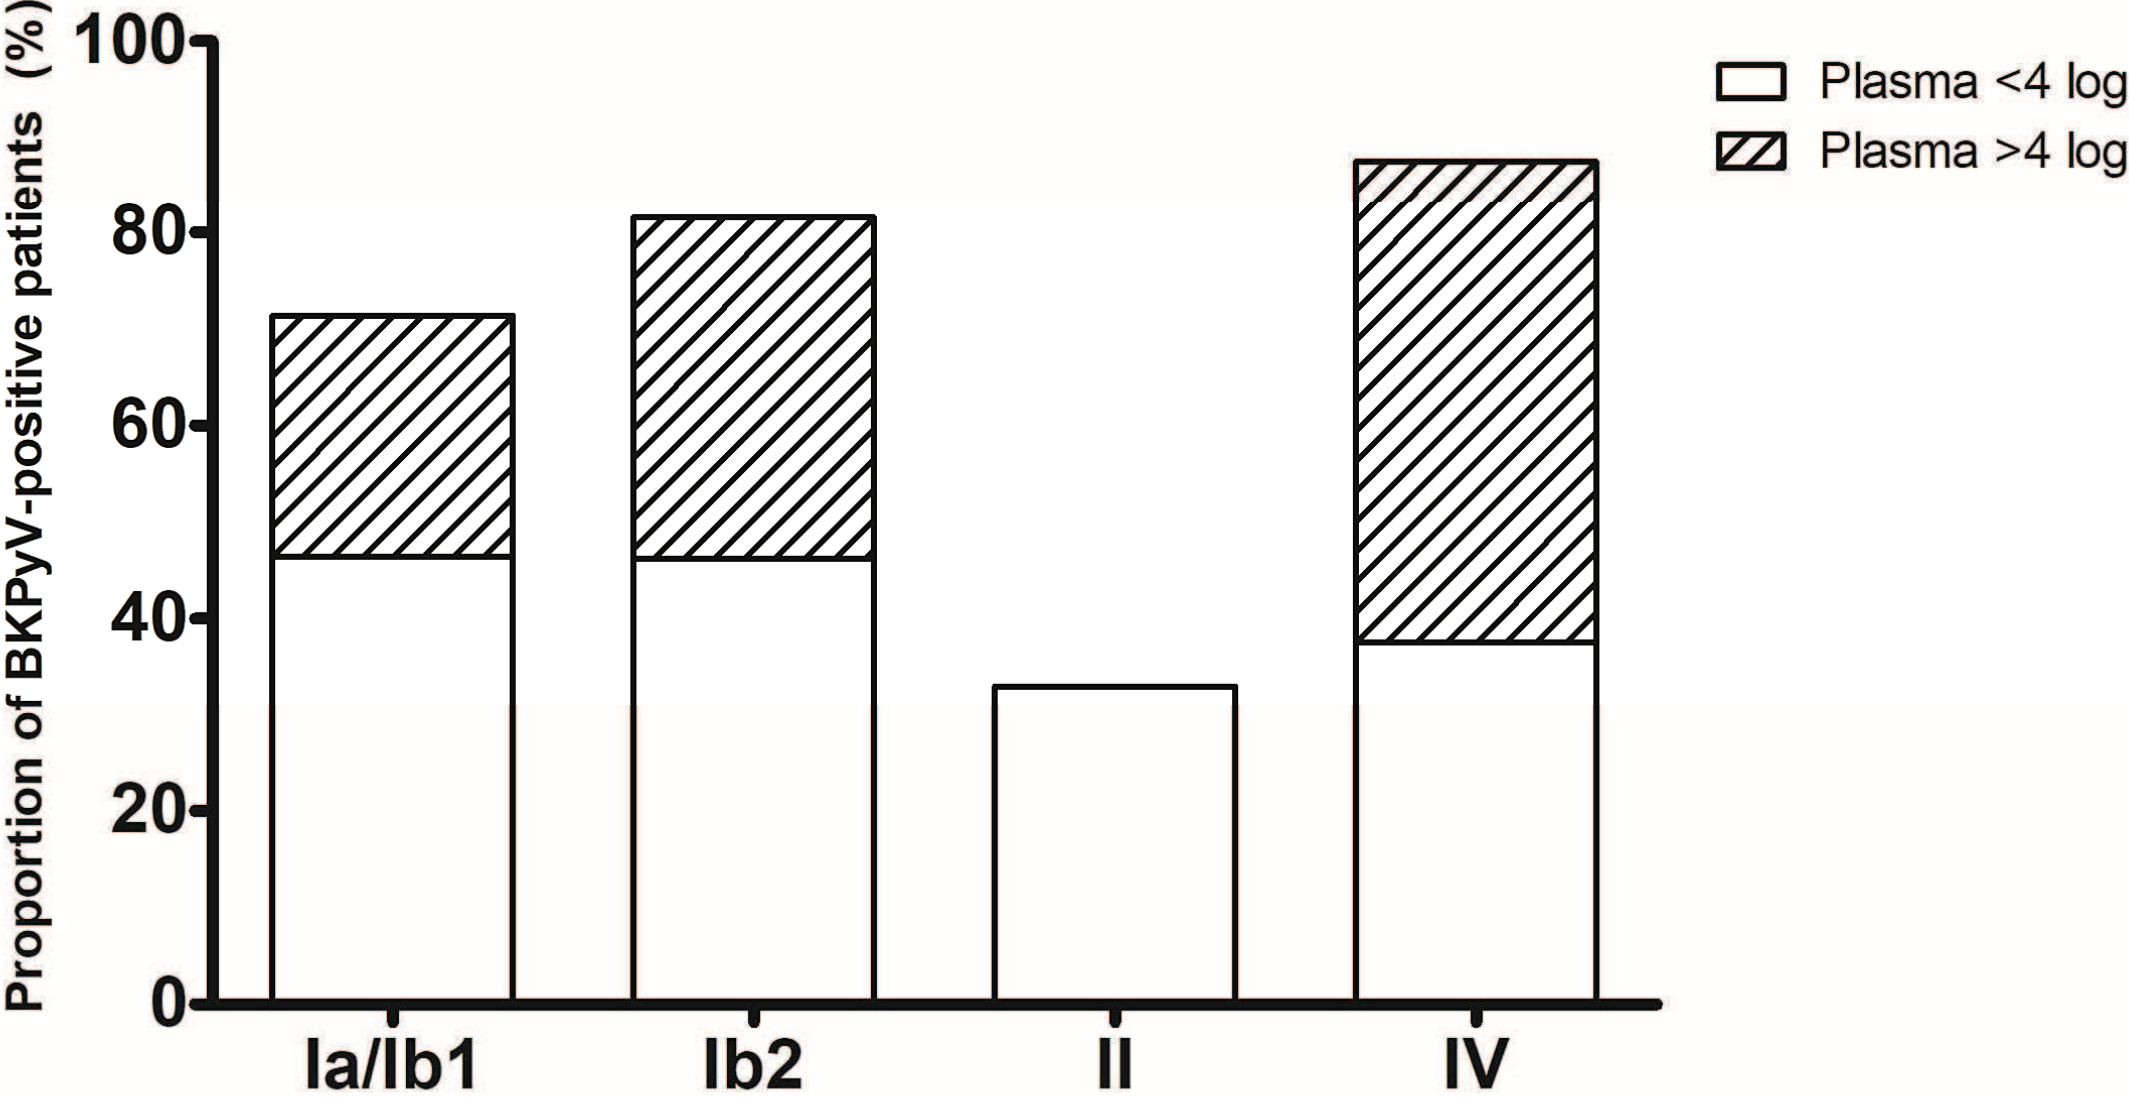

Supplement: s1 [file s1]
